# Supplementary material
Source: PubMed Central journal article supplement (PMC4382039)
Supplement: supp_3.1.E23_2014-0053-1-at.pdf [file supp_3.1.E23_2014-0053-1-at.pdf]

## Appendix 1 (as supplied by the authors): Search strategy example — Medline OVID

|                      |                                                                                                                                                                                                                                                                                                                                                                                                                                                                                                                                                                                                                                                                                                                                                                                                                                                                                                                                                                                                                                                                                                                                                                                                                                                                                                                                                                                                                                                                                                                                                                                                                                                                                                                                                                                                                                                                                |
|----------------------|--------------------------------------------------------------------------------------------------------------------------------------------------------------------------------------------------------------------------------------------------------------------------------------------------------------------------------------------------------------------------------------------------------------------------------------------------------------------------------------------------------------------------------------------------------------------------------------------------------------------------------------------------------------------------------------------------------------------------------------------------------------------------------------------------------------------------------------------------------------------------------------------------------------------------------------------------------------------------------------------------------------------------------------------------------------------------------------------------------------------------------------------------------------------------------------------------------------------------------------------------------------------------------------------------------------------------------------------------------------------------------------------------------------------------------------------------------------------------------------------------------------------------------------------------------------------------------------------------------------------------------------------------------------------------------------------------------------------------------------------------------------------------------------------------------------------------------------------------------------------------------|
| <b>Database</b>      | Medline OVID                                                                                                                                                                                                                                                                                                                                                                                                                                                                                                                                                                                                                                                                                                                                                                                                                                                                                                                                                                                                                                                                                                                                                                                                                                                                                                                                                                                                                                                                                                                                                                                                                                                                                                                                                                                                                                                                   |
| <b>Date Last Run</b> | August 1, 2013                                                                                                                                                                                                                                                                                                                                                                                                                                                                                                                                                                                                                                                                                                                                                                                                                                                                                                                                                                                                                                                                                                                                                                                                                                                                                                                                                                                                                                                                                                                                                                                                                                                                                                                                                                                                                                                                 |
| <b>Search Terms</b>  | <ol style="list-style-type: none"> <li>1. exp Obesity/</li> <li>2. Weight Gain/</li> <li>3. exp Weight Loss/</li> <li>4. obes\$.af.</li> <li>5. (weight gain or weight loss).af.</li> <li>6. (overweight or over weight or overeate\$ or over eat\$).af.</li> <li>7. weight change\$.af.</li> <li>8. ((bmi or body mass index) adj2 (gain or loss or change)).af.</li> <li>9. or/1-8</li> <li>10. exp Behavior Therapy/</li> <li>11. social support/</li> <li>12. exp Psychotherapy, Group/</li> <li>13. ((psychological or behavio?r\$) adj (therapy or modif\$ or strateg\$ or intervention\$)).af.</li> <li>14. (group therapy or family therapy or cognitive therapy).af.</li> <li>15. ((lifestyle or life style) adj (chang\$ or intervention\$)).af.</li> <li>16. counsel?ing.af.</li> <li>17. social support.af.</li> <li>18. (peer adj2 support).af.</li> <li>19. (children adj3 parent\$ adj3 therapy).af.</li> <li>20. or/10-19</li> <li>21. exp OBESITY/dh [Diet Therapy]</li> <li>22. exp Diet Therapy/</li> <li>23. Fasting/</li> <li>24. (diets or diet or dieting).af.</li> <li>25. (diet\$ adj (modif\$ or therapy or intervention\$ or strateg\$)).af.</li> <li>26. (low calorie or calorie control\$ or healthy eating).af.</li> <li>27. (fasting or modified fast\$).af.</li> <li>28. exp Dietary Fats/</li> <li>29. (fruit or vegetable*).af.</li> <li>30. (high fat\$ or low fat\$ or fatty food\$).af.</li> <li>31. formula diet\$.af.</li> <li>32. or/21-31</li> <li>33. exp Exercise/</li> <li>34. exp Exercise Therapy/</li> <li>35. exercis\$.af.</li> <li>36. (aerobics or physical therapy or physical activity or physical inactivity).af.</li> <li>37. (fitness adj (class\$ or regime\$ or program\$)).af.</li> <li>38. (aerobics or physical therapy or physical training or physical education).af.</li> <li>39. dance therapy.af.</li> </ol> |

40. Sedentary Lifestyle/ or sedentary behavior?.af.
41. or/33-40
42. exp Complementary Therapies/
43. (alternative medicine or complementary therapy\$ or complementary medicine).af.
44. (hypnotism or hypnosis or hypnotherapy).af.
45. (acupuncture or homeopathy or homoeopathy).af.
46. (chinese medicine or indian medicine or herbal medicine or ayurvedic).af.
47. or/42-46
48. ((diet or dieting or slim\$) adj (club\$ or organization)).af.
49. (weightwatcher\$ or weight watcher\$).af.
50. (correspondence adj (course\$ or program\$)).af.
51. (fat camp\$ or diet\$ camp\$).af.
52. or/48-51
53. exp Health Promotion/
54. exp Health Education/
55. (health promotion or health education).af.
56. (media intervention\$ or community intervention\$).af.
57. health promoting school\$.af.
58. ((school or community) adj2 program\$).af.
59. ((school or community) adj2 intervention\$).af.
60. (family intervention\$ or parent\$ intervention).af.
61. (parent\$ adj2 (behavior?r or involve\$ or control\$ or attitude\$ or education\$)).af.
62. or/53-61
63. exp Health Policy/
64. (health polic\$ or school polic\$ or food polic\$ or nutrition polic\$).af.
65. 63 or 64
66. exp OBESITY/pc [Prevention & Control]
67. exp Primary Prevention/
68. (primary prevention or secondary prevention).af.
69. (preventive measure\$ or preventative measure\$).af.
70. (preventive care or preventative care).af.
71. (obesity adj2 (prevent\$ or treat\$)).af.
72. or/66-71
73. randomized controlled trial.pt.
74. controlled clinical trial.pt.
75. Random Allocation/
76. Double-Blind Method/
77. single-blind method/
78. Placebos/
79. \*Research Design/
80. intervention studies/
81. evaluation studies/
82. Comparative Study/
83. exp Longitudinal Studies/

- |  |                                                                                                                                                                                                                                                                                                                                                                                                                                                                                                                                                                                                                                                                                                                                                                                                                                                                                                                                                                                                                                                                                                                                                                                                                                                                                                                                                                                                                                                  |
|--|--------------------------------------------------------------------------------------------------------------------------------------------------------------------------------------------------------------------------------------------------------------------------------------------------------------------------------------------------------------------------------------------------------------------------------------------------------------------------------------------------------------------------------------------------------------------------------------------------------------------------------------------------------------------------------------------------------------------------------------------------------------------------------------------------------------------------------------------------------------------------------------------------------------------------------------------------------------------------------------------------------------------------------------------------------------------------------------------------------------------------------------------------------------------------------------------------------------------------------------------------------------------------------------------------------------------------------------------------------------------------------------------------------------------------------------------------|
|  | <p>84. cross-over studies/<br/> 85. clinical trial.tw.<br/> 86. clinical trial.pt.<br/> 87. latin square.tw.<br/> 88. (time adj series).tw.<br/> 89. (before adj2 after adj3 (stud\$ or trial\$ or design\$)).tw.<br/> 90. placebo\$.tw.<br/> 91. random\$.tw.<br/> 92. (matched communities or matched schools or matched populations).tw.<br/> 93. control\$.tw.<br/> 94. (comparison group\$ or control group\$).tw.<br/> 95. matched pairs.tw.<br/> 96. (outcome study or outcome studies).tw.<br/> 97. ((singl\$ or doubl\$ or trebl\$ or tripl\$) adj5 (blind\$ or mask)).tw.<br/> 98. (quasiexperimental or quasi experimental or pseudo experimental).tw.<br/> 99. (nonrandomi?ed or non randomi?ed or pseudo randomi?sed or quasi randomi?ed).tw.<br/> 100. prospectiv\$.tw.<br/> 101. volunteer\$.tw.<br/> 102. or/73-101<br/> 103. 20 or 32 or 41 or 47 or 52 or 62 or 65 or 72<br/> 104. 9 and 102 and 103<br/> 105. Animals/<br/> 106. exp Child/<br/> 107. Adolescent/<br/> 108. exp Infant/<br/> 109. (child\$ or adolescen\$ or infant\$).af.<br/> 110. (teenage\$ or young people or young person or young adult\$).af.<br/> 111. (schoolchildren or school children).af.<br/> 112. (pediatr\$ or paediatr\$).af.<br/> 113. (boys or girls or youth or youths).af.<br/> 114. or/106-113<br/> 115. 104 not 105<br/> 116. 114 and 115<br/> 117. limit 116 to ed=20120101-20121122<br/> 118. limit 116 to ed=20121122-20130801</p> |
|--|--------------------------------------------------------------------------------------------------------------------------------------------------------------------------------------------------------------------------------------------------------------------------------------------------------------------------------------------------------------------------------------------------------------------------------------------------------------------------------------------------------------------------------------------------------------------------------------------------------------------------------------------------------------------------------------------------------------------------------------------------------------------------------------------------------------------------------------------------------------------------------------------------------------------------------------------------------------------------------------------------------------------------------------------------------------------------------------------------------------------------------------------------------------------------------------------------------------------------------------------------------------------------------------------------------------------------------------------------------------------------------------------------------------------------------------------------|
