# Supplementary material
Source: PubMed Central journal article supplement (PMC4382039)
Supplement: supp_3.1.E23_2014-0053-2-at.pdf [file supp_3.1.E23_2014-0053-2-at.pdf]

## Appendix 2 (as supplied by the authors): Summary of risk-of-bias assessment of included studies using Cochrane Collaboration's risk-of-bias tool<sup>1</sup>

| Study                            | Sequence generation | Allocation concealment | Blinding of personnel/ participants | Blinding of outcome assessors | Incomplete reporting | Selective reporting | Other bias |
|----------------------------------|---------------------|------------------------|-------------------------------------|-------------------------------|----------------------|---------------------|------------|
| Amaro 2006 <sup>2</sup>          | U                   | U                      | H                                   | U                             | H                    | L                   | L          |
| Baranowski 2003 <sup>3</sup>     | L                   | U                      | H                                   | U                             | L                    | H                   | H          |
| Barkin 2012 <sup>4</sup>         | L                   | L                      | H                                   | U                             | H                    | L                   | L          |
| Beech 2003 <sup>5</sup>          | L                   | U                      | H                                   | U                             | L                    | H                   | H          |
| Bellows 2013 <sup>6</sup>        | U                   | U                      | H                                   | H                             | U                    | L                   | L          |
| Black 2010 <sup>7</sup>          | L                   | U                      | H                                   | L                             | L                    | L                   | L          |
| Bonsergent 2013 <sup>8</sup>     | U                   | U                      | H                                   | L                             | H                    | L                   | L          |
| Brandstetter 2012 <sup>9</sup>   | U                   | U                      | H                                   | U                             | L                    | L                   | L          |
| Brown 2013 <sup>10</sup>         | L                   | U                      | H                                   | U                             | L                    | L                   | L          |
| Burgi 2012 <sup>11</sup>         | L                   | L                      | H                                   | L                             | L                    | L                   | H          |
| Caballero 2003 <sup>12</sup>     | L                   | L                      | H                                   | L                             | L                    | L                   | L          |
| Campbell 2013 <sup>13</sup>      | L                   | H                      | H                                   | H                             | L                    | L                   | L          |
| Crespo 2012 <sup>14</sup>        | U                   | U                      | H                                   | L                             | H                    | L                   | L          |
| Cunha 2013 <sup>15</sup>         | U                   | L                      | H                                   | U                             | L                    | L                   | L          |
| Daniels 2012 <sup>16</sup>       | U                   | U                      | H                                   | L                             | L                    | L                   | L          |
| DeBar 2011 <sup>17</sup>         | L                   | L                      | H                                   | U                             | L                    | L                   | L          |
| De Coen 2012 <sup>18</sup>       | U                   | U                      | H                                   | U                             | L                    | L                   | L          |
| de Heer 2011 <sup>19</sup>       | U                   | U                      | H                                   | U                             | L                    | L                   | H          |
| de Ruyter 2012 <sup>20</sup>     | L                   | L                      | H                                   | L                             | L                    | L                   | L          |
| Donnelly 2009 <sup>21</sup>      | U                   | U                      | H                                   | L                             | L                    | L                   | L          |
| Dzewaltowski 2010 <sup>22</sup>  | L                   | U                      | H                                   | H                             | L                    | L                   | L          |
| Ebbeling 2006 <sup>23</sup>      | L                   | L                      | H                                   | L                             | L                    | L                   | L          |
| El Ansari 2010 <sup>24</sup>     | U                   | U                      | H                                   | U                             | U                    | L                   | L          |
| Escribano 2012 <sup>25</sup>     | H                   | U                      | H                                   | L                             | L                    | L                   | H          |
| Fitzgibbon 2005 <sup>26</sup>    | U                   | U                      | H                                   | U                             | L                    | L                   | L          |
| Fitzgibbon 2006 <sup>27</sup>    | U                   | U                      | H                                   | U                             | L                    | L                   | H          |
| Fitzgibbon 2011 <sup>28</sup>    | U                   | U                      | H                                   | U                             | L                    | L                   | L          |
| Fitzgibbon 2013 <sup>29</sup>    | U                   | H                      | H                                   | U                             | L                    | L                   | L          |
| Foster 2008 <sup>30</sup>        | U                   | U                      | H                                   | H                             | H                    | L                   | L          |
| Foster 2010 <sup>31</sup>        | U                   | U                      | H                                   | U                             | L                    | H                   | L          |
| French 2011 <sup>32</sup>        | U                   | U                      | H                                   | U                             | L                    | L                   | H          |
| Fung 2012 <sup>33</sup>          | H                   | H                      | H                                   | U                             | L                    | L                   | L          |
| Gentile 2009 <sup>34</sup>       | U                   | U                      | H                                   | U                             | U                    | L                   | L          |
| Greening 2011 <sup>35</sup>      | U                   | U                      | H                                   | U                             | L                    | L                   | L          |
| Haerens 2006 <sup>36</sup>       | U                   | L                      | H                                   | U                             | H                    | L                   | H          |
| Hakanen 2010 <sup>37</sup>       | U                   | U                      | H                                   | U                             | H                    | L                   | L          |
| Harvey-Berino 2003 <sup>38</sup> | U                   | U                      | H                                   | L                             | L                    | L                   | H          |
| Hoffman 2011 <sup>39</sup>       | U                   | U                      | H                                   | H                             | H                    | L                   | H          |
| Howe 2011 <sup>40</sup>          | U                   | U                      | H                                   | U                             | U                    | L                   | L          |
| James 2004 <sup>41</sup>         | L                   | U                      | H                                   | U                             | H                    | L                   | L          |
| Jansen 2011 <sup>42</sup>        | L                   | U                      | H                                   | H                             | L                    | L                   | L          |
| Katz 2001 <sup>43</sup>          | U                   | U                      | H                                   | U                             | L                    | L                   | H          |
| Klesges 2011 <sup>44</sup>       | L                   | H                      | H                                   | L                             | H                    | L                   | L          |
| Kriemler 2010 <sup>45</sup>      | L                   | U                      | H                                   | L                             | L                    | L                   | L          |
| Lazaar 2007 <sup>46</sup>        | L                   | U                      | H                                   | U                             | L                    | L                   | H          |
| Li 2010 <sup>47</sup>            | U                   | U                      | H                                   | L                             | L                    | L                   | H          |
| Llargues 2012 <sup>48</sup>      | U                   | U                      | H                                   | U                             | H                    | L                   | H          |
| Lloyd 2012 <sup>49</sup>         | U                   | U                      | H                                   | L                             | L                    | L                   | H          |

| Study                               | Sequence generation | Allocation concealment | Blinding of personnel/ participants | Blinding of outcome assessors | Incomplete reporting | Selective reporting | Other bias |
|-------------------------------------|---------------------|------------------------|-------------------------------------|-------------------------------|----------------------|---------------------|------------|
| Lubans 2011 <sup>50</sup>           | U                   | U                      | H                                   | H                             | L                    | L                   | H          |
| Lubans 2012 <sup>51</sup>           | U                   | U                      | H                                   | H                             | L                    | L                   | L          |
| Madsen 2013 <sup>52</sup>           | U                   | U                      | H                                   | H                             | L                    | L                   | L          |
| Magnusson 2012 <sup>53</sup>        | U                   | U                      | H                                   | U                             | H                    | L                   | L          |
| Marcus 2009 <sup>54</sup>           | U                   | U                      | H                                   | U                             | H                    | L                   | L          |
| Martinez 2008 <sup>55</sup>         | L                   | L                      | H                                   | H                             | L                    | L                   | L          |
| Mihas 2009 <sup>56</sup>            | L                   | U                      | H                                   | H                             | L                    | L                   | L          |
| Morgan 2011 <sup>57</sup>           | L                   | L                      | H                                   | H                             | L                    | L                   | L          |
| Mo-suwan 1998 <sup>58</sup>         | U                   | U                      | H                                   | U                             | L                    | L                   | L          |
| Muckelbauer 2012 <sup>59</sup>      | U                   | U                      | H                                   | U                             | H                    | L                   | H          |
| Nemet 2011a <sup>60</sup>           | L                   | U                      | H                                   | L                             | L                    | L                   | L          |
| Nemet 2011b <sup>61</sup>           | L                   | U                      | H                                   | L                             | L                    | L                   | L          |
| Newmark-Sztainer 2010 <sup>62</sup> | U                   | U                      | H                                   | U                             | L                    | L                   | L          |
| Newmark-Sztainer 2003 <sup>63</sup> | U                   | H                      | H                                   | U                             | L                    | L                   | L          |
| Ostbye 2012 <sup>64</sup>           | L                   | U                      | H                                   | U                             | U                    | L                   | L          |
| Paineau 2008 <sup>65</sup>          | L                   | U                      | H                                   | U                             | L                    | L                   | H          |
| Papadaki 2010 <sup>66</sup>         | L                   | U                      | H                                   | U                             | H                    | L                   | H          |
| Peralta 2009 <sup>67</sup>          | L                   | U                      | H                                   | L                             | L                    | L                   | H          |
| Reed 2008 <sup>68</sup>             | U                   | U                      | H                                   | U                             | L                    | L                   | L          |
| Reilly 2006 <sup>69</sup>           | L                   | L                      | H                                   | L                             | L                    | L                   | L          |
| Robinson 2003 <sup>70</sup>         | L                   | U                      | H                                   | L                             | L                    | H                   | H          |
| Robinson 2010 <sup>71</sup>         | U                   | U                      | H                                   | L                             | L                    | L                   | H          |
| Rosario 2013 <sup>72</sup>          | L                   | U                      | H                                   | L                             | H                    | L                   | U          |
| Rosenkranz 2010 <sup>73</sup>       | L                   | U                      | H                                   | U                             | L                    | L                   | L          |
| Rush 2012 <sup>74</sup>             | L                   | L                      | H                                   | L                             | H                    | L                   | L          |
| Salcedo 2010 <sup>75</sup>          | U                   | U                      | H                                   | U                             | H                    | L                   | H          |
| Shamah 2012 <sup>76</sup>           | U                   | U                      | H                                   | U                             | L                    | L                   | H          |
| Sichieri 2009 <sup>77</sup>         | U                   | U                      | H                                   | U                             | L                    | L                   | L          |
| Siegrist 2013 <sup>78</sup>         | U                   | U                      | H                                   | U                             | L                    | L                   | U          |
| Simon 2008 <sup>79</sup>            | U                   | U                      | H                                   | U                             | L                    | L                   | L          |
| Singh 2009 <sup>80</sup>            | L                   | L                      | H                                   | H                             | L                    | L                   | L          |
| Singhal 2010 <sup>81</sup>          | U                   | U                      | H                                   | U                             | L                    | L                   | H          |
| Story 2003 <sup>82</sup>            | L                   | U                      | H                                   | U                             | L                    | H                   | H          |
| Story 2012 <sup>83</sup>            | U                   | U                      | H                                   | U                             | L                    | L                   | H          |
| Telford 2012 <sup>84</sup>          | U                   | U                      | H                                   | U                             | U                    | L                   | L          |
| Thivel 2010 <sup>85</sup>           | U                   | U                      | H                                   | U                             | L                    | L                   | H          |
| Velez 2010 <sup>86</sup>            | U                   | U                      | H                                   | U                             | L                    | L                   | H          |
| Webber 2008 <sup>87</sup>           | U                   | U                      | H                                   | L                             | L                    | L                   | L          |
| Weeks 2012 <sup>88</sup>            | U                   | U                      | H                                   | U                             | L                    | L                   | L          |
| Wen 2012 <sup>89</sup>              | L                   | L                      | H                                   | L                             | L                    | L                   | L          |
| Williamson 2012 <sup>90</sup>       | U                   | U                      | H                                   | U                             | H                    | L                   | L          |
| Yin 2012 <sup>91</sup>              | U                   | U                      | H                                   | H                             | H                    | L                   | L          |

L = Low Risk; U = Unclear Risk; H = High Risk

## References

1. *Cochrane handbook for systematic reviews of interventions*. Version 5.1.0. New York: John Wiley & Sons, Ltd. Publications; 2011.

2. Amaro S, Viggiano A, Di Costanzo A, et al. Kalèdo, a new educational board-game, gives nutritional rudiments and encourages healthy eating in children: a pilot cluster randomized trial. *Eur J Pediatr* 2006;165:630-5.
3. Baranowski T, Baranowski JC, Cullen KW, et al. The Fun, Food, and Fitness Project (FFFP): the Baylor GEMS pilot study. *Ethn Dis* 2003;13(Suppl 1):S30-9.
4. Barkin SL, Gesell S, Po'e E, et al. Culturally tailored, family-centered, behavioral obesity intervention for Latino-American preschool-aged children. *Pediatrics* 2012;130:445-56.
5. Beech BM, Klesges RC, Kumanyika SK, et al. Child- and parent-targeted interventions: the Memphis GEMS pilot study. *Ethn Dis* 2003;13(Suppl 1):S40-53.
6. Bellows LL, Davies PL, Anderson J, et al. Effectiveness of a physical activity intervention for Head Start preschoolers: a randomized intervention study. *Am J Occup Ther* 2013;67:28-36.
7. Black MM, Hager ER, Le K, et al. Challenge! Health promotion/obesity prevention mentorship model among urban, black adolescents. *Pediatrics* 2010;126:280-8.
8. Bonsergent E, Agrinier N, Thilly N, et al. Overweight and obesity prevention for adolescents: a cluster randomized controlled trial in a school setting. *Am J Prev Med* 2013;44:30-9.
9. Brandstetter S, Klenk J, Berg S, et al. Overweight prevention implemented by primary school teachers: a randomised controlled trial. *Obes Facts* 2012;5:1-11.
10. Brown B, Noonan C, Harris KJ, et al. Developing and piloting the Journey to Native Youth Health program in Northern Plains Indian communities. *Diabetes Educ* 2013;39:109-18.
11. Bürgi F, Niederer I, Schindler C, et al. Effect of a lifestyle intervention on adiposity and fitness in socially disadvantaged subgroups of preschoolers: a cluster-randomized trial (Ballabeina). *Prev Med* 2012;54:335-40.
12. Caballero B, Clay T, Davis SM, et al. Pathways: a school-based, randomized controlled trial for the prevention of obesity in American Indian schoolchildren. *Am J Clin Nutr* 2003;78:1030-8.
13. Campbell KJ, Lioret S, McNaughton SA, et al. A parent-focused intervention to reduce infant obesity risk behaviors: a randomized trial. *Pediatrics* 2013;131:652-60.
14. Crespo NC, Elder JP, Ayala GX, et al. Results of a multi-level intervention to prevent and control childhood obesity among Latino children: the Aventuras Para Niños Study. *Ann Behav Med* 2012;43:84-100.
15. Cunha DB, de Souza B, Pereira RA, et al. Effectiveness of a randomized school-based intervention involving families and teachers to prevent excessive weight gain among adolescents in Brazil. *PLoS ONE* 2013;8:e57498.
16. Daniels LA, Mallan KM, Battistutta D, et al. Evaluation of an intervention to promote protective infant feeding practices to prevent childhood obesity: outcomes of the NOURISH RCT at 14 months of age and 6 months post the first of two intervention modules. *Int J Obes (Lond)* 2012;36:1292-8.
17. DeBar LL, Schneider M, Drews KL, et al. Student public commitment in a school-based diabetes prevention project: impact on physical health and health behavior. *BMC Public Health* 2011;11:711.
18. De Coen V, De Bourdeaudhuij I, Vereecken C, et al. Effects of a 2-year healthy eating and physical activity intervention for 3-6-year-olds in communities of high and low socioeconomic status: the POP (Prevention of Overweight among Pre-school and school children) project. *Public Health Nutr* 2012;15:1737-45.

19. de Heer HD, Koehly L, Pederson R, et al. Effectiveness and spillover of an after-school health promotion program for Hispanic elementary school children. *Am J Public Health* 2011;101:1907-13.
20. de Ruyter JC, Olthof MR, Seidell JC, et al. A trial of sugar-free or sugar-sweetened beverages and body weight in children. *N Engl J Med* 2012;367:1397-406.
21. Donnelly JE, Greene JL, Gibson CA, et al. Physical Activity Across the Curriculum (PAAC): a randomized controlled trial to promote physical activity and diminish overweight and obesity in elementary school children. *Prev Med* 2009;49:336-41.
22. Dziewaltowski DA, Rosenkranz RR, Geller KS, et al. HOP’N after-school project: an obesity prevention randomized controlled trial. *Int J Behav Nutr Phys Act* 2010;7:90.
23. Ebbeling CB, Feldman HA, Osganian SK, et al. Effects of decreasing sugar-sweetened beverage consumption on body weight in adolescents: a randomized, controlled pilot study. *Pediatrics* 2006;117:673-80.
24. El Ansari W, El Ashker S, Moseley L. Associations between physical activity and health parameters in adolescent pupils in Egypt. *Int J Environ Res Public Health* 2010;7:1649-69.
25. Escribano J, Luque V, Ferre N, et al. Effect of protein intake and weight gain velocity on body fat mass at 6 months of age: the EU Childhood Obesity Programme. *Int J Obes (Lond)* 2012;36:548-53.
26. Fitzgibbon ML, Stolley MR, Schiffer L, et al. Two-year follow-up results for Hip-Hop to Health Jr.: a randomized controlled trial for overweight prevention in preschool minority children. *J Pediatr* 2005;146:618-25.
27. Fitzgibbon ML, Stolley MR, Schiffer L, et al. Hip-Hop to Health Jr. for Latino preschool children. *Obesity (Silver Spring)* 2006;14:1616-25.
28. Fitzgibbon ML, Stolley MR, Schiffer LA, et al. Hip-Hop to Health Jr. Obesity Prevention Effectiveness Trial: postintervention results. *Obesity (Silver Spring)* 2011;19:994-1003.
29. Fitzgibbon ML, Stolley MR, Schiffer L, et al. Family-based hip-hop to health: outcome results. *Obesity (Silver Spring)* 2013;21:274-83.
30. Foster GD, Sherman S, Borradaile KE, et al. A policy-based school intervention to prevent overweight and obesity. *Pediatrics* 2008;121:e794-802.
31. HEALTHY study group, Foster GD, Linder B, et al. A school-based intervention for diabetes risk reduction. *N Engl J Med* 2010;363:443-53.
32. French SA, Gerlach AF, Mitchell NR, et al. Household obesity prevention: Take Action — a group-randomized trial. *Obesity (Silver Spring)* 2011;19:2082-8.
33. Fung C, Kuhle S, Lu C, et al. From “best practice” to “next practice”: the effectiveness of school-based health promotion in improving healthy eating and physical activity and preventing childhood obesity. *Int J Behav Nutr Phys Act* 2012;9:27.
34. Gentile DA, Welk G, Eisenmann JC, et al. Evaluation of a multiple ecological level child obesity prevention program: Switch what you Do, View, and Chew. *BMC Med* 2009;7:49.
35. Greening L, Harrell KT, Low AK, et al. Efficacy of a school-based childhood obesity intervention program in a rural southern community: TEAM Mississippi Project. *Obesity (Silver Spring)* 2011;19:1213-9.
36. Haerens L, Deforche B, Maes L, et al. Evaluation of a 2-year physical activity and healthy eating intervention in middle school children. *Health Educ Res* 2006;21:911-21.

37. Hakanen M, Lagström H, Pahkala K, et al. Dietary and lifestyle counselling reduces the clustering of overweight-related cardiometabolic risk factors in adolescents. *Acta Paediatr* 2010;99:888-95.
38. Harvey-Berino J, Rourke J. Obesity prevention in preschool native-american children: a pilot study using home visiting. *Obes Res* 2003;11:606-11.
39. Hoffman JA, Thompson DR, Franko DL, et al. Decaying behavioral effects in a randomized, multi-year fruit and vegetable intake intervention. *Prev Med* 2011;52:370-5.</jrn>
40. Howe CA, Harris RA, Gutin B. A 10-month physical activity intervention improves body composition in young black boys. *J Obes* 2011;2011:358581.
41. James J, Thomas P, Cavan D, et al. Preventing childhood obesity by reducing consumption of carbonated drinks: cluster randomised controlled trial [published erratum in *BMJ* 2004;328:1236]. *BMJ* 2004;328:1237.
42. Jansen W, Borsboom G, Meima A, et al. Effectiveness of a primary school-based intervention to reduce overweight. *Int J Pediatr Obes* 2011;6:e70-7.
43. Katz DL, Katz CS, Treu JA, et al. Teaching healthful food choices to elementary school students and their parents: the Nutrition Detectives™ program. *J Sch Health* 2011;81:21-8.
44. Klesges RC, Obarzanek E, Kumanyika S, et al. The Memphis Girls' health Enrichment Multi-site Studies (GEMS): an evaluation of the efficacy of a 2-year obesity prevention program in African American girls. *Arch Pediatr Adolesc Med* 2010;164:1007-14.
45. Kriemler S, Zahner L, Schindler C, et al. Effect of school based physical activity programme (KISS) on fitness and adiposity in primary schoolchildren: cluster randomised controlled trial. *BMJ* 2010;340:c785.
46. Lazaar N, Aucouturier J, Ratel S, et al. Effect of physical activity intervention on body composition in young children: influence of body mass index status and gender. *Acta Paediatr* 2007;96:1315-20.
47. Li YP, Hu XQ, Schouten EG, et al. Report on childhood obesity in China (8): effects and sustainability of physical activity intervention on body composition of Chinese youth. *Biomed Environ Sci* 2010;23:180-7.
48. Llargués E, Recasens A, Franco R, et al. Medium-term evaluation of an educational intervention on dietary and physical exercise habits in schoolchildren: the Avall 2 study. *Endocrinol Nutr* 2012;59:288-95.
49. Lloyd JJ, Wyatt KM, Creanor S. Behavioural and weight status outcomes from an exploratory trial of the Healthy Lifestyles Programme (HeLP): a novel school-based obesity prevention programme. *BMJ Open* 2012;2:e000390.
50. Lubans DR, Morgan PJ, Aguiar EJ, et al. Randomized controlled trial of the Physical Activity Leaders (PALs) program for adolescent boys from disadvantaged secondary schools. *Prev Med* 2011;52:239-46.
51. Lubans DR, Morgan PJ, Okely AD, et al. Preventing obesity among adolescent girls: one-year outcomes of the Nutrition and Enjoyable Activity for Teen Girls (NEAT Girls) cluster randomized controlled trial. *Arch Pediatr Adolesc Med* 2012;166:821-7.
52. Madsen K, Thompson H, Adkins A, et al. School-community partnerships: a cluster-randomized trial of an after-school soccer program. *JAMA Pediatr* 2013;167:321-6.
53. Magnusson KT, Hrafnkelsson H, Sigurgeirsson I, et al. Limited effects of a 2-year school-based physical activity intervention on body composition and cardiorespiratory fitness in 7-year-old children. *Health Educ Res* 2012;27:484-94.

54. Marcus C, Nyberg G, Nordenfelt A, et al. A 4-year, cluster-randomized, controlled childhood obesity prevention study: STOPP. *Int J Obes (Lond)* 2009;33:408-17.
55. Martínez Vizcaíno V, Salcedo AF, Franquelo Gutiérrez R, et al. Assessment of an after-school physical activity program to prevent obesity among 9- to 10-year-old children: a cluster randomized trial. *Int J Obes (Lond)* 2008;32:12-22.
56. Mihas C, Mariolis A, Manios Y, et al. Evaluation of a nutrition intervention in adolescents of an urban area in Greece: short- and long-term effects of the VYRONAS study. *Public Health Nutr* 2010;13:712-9.
57. Morgan PJ, Lubans DR, Callister R, et al. The 'Healthy Dads, Healthy Kids' randomized controlled trial: efficacy of a healthy lifestyle program for overweight fathers and their children. *Int J Obes (Lond)* 2011;35:436-47.
58. Mo-suwan L, Pongprapai S, Junjana C, et al. Effects of a controlled trial of a school-based exercise program on the obesity indexes of preschool children. *Am J Clin Nutr* 1998;68:1006-11.
59. Muckelbauer R, Libuda L, Clausen K, et al. Promotion and provision of drinking water in schools for overweight prevention: randomized, controlled cluster trial. *Nutr Today* 2012;47:S27-34.
60. Nemet D, Geva D, Eliakim A. Health promotion intervention in low socioeconomic kindergarten children. *J Pediatr* 2011;158:796-801.e1.
61. Nemet D, Geva D, Pantanowitz M, et al. Health promotion intervention in Arab-Israeli kindergarten children. *J Pediatr Endocrinol Metab* 2011;24:1001-7.
62. Neumark-Sztainer DR, Friend SE, Flattum CF, et al. New moves-preventing weight-related problems in adolescent girls a group-randomized study. *Am J Prev Med* 2010;39:421-32.
63. Neumark-Sztainer D, Story M, Hannan PJ, et al. New Moves: a school-based obesity prevention program for adolescent girls. *Prev Med* 2003;37:41-51.
64. Østbye T, Krause KM, Stroo M, et al. Parent-focused change to prevent obesity in preschoolers: results from the KAN-DO study. *Prev Med* 2012;55:188-95.
65. Paineau DL, Beaufils F, Boulier A, et al. Family dietary coaching to improve nutritional intakes and body weight control: a randomized controlled trial. *Arch Pediatr Adolesc Med* 2008;162:34-43.
66. Papadaki A, Linardakis M, Larsen TM, et al. The effect of protein and glycemic index on children's body composition: the DiOGenes randomized study. *Pediatrics* 2010;126:e1143-52.
67. Peralta LR, Jones RA, Okely AD. Promoting healthy lifestyles among adolescent boys: the Fitness Improvement and Lifestyle Awareness Program RCT. *Prev Med* 2009;48:537-42.
68. Reed KE, Warburton DE, Macdonald HM, et al. Action Schools! BC: a school-based physical activity intervention designed to decrease cardiovascular disease risk factors in children. *Prev Med* 2008;46:525-31.
69. Reilly JJ, Kelly L, Montgomery C, et al. Physical activity to prevent obesity in young children: cluster randomised controlled trial. *BMJ* 2006;333:1041.
70. Robinson TN, Killen JD, Kraemer HC, et al. Dance and reducing television viewing to prevent weight gain in African-American girls: the Stanford GEMS pilot study. *Ethn Dis* 2003;13(Suppl 1):S65-77.

71. Robinson TN, Matheson DM, Kraemer HC, et al. A randomized controlled trial of culturally tailored dance and reducing screen time to prevent weight gain in low-income African American girls: Stanford GEMS. *Arch Pediatr Adolesc Med* 2010;164:995-1004.
72. Rosário R, Araújo A, Oliveira B, et al. Impact of an intervention through teachers to prevent consumption of low nutrition, energy-dense foods and beverages: a randomized trial. *Prev Med* 2013;57:20-5.
73. Rosenkranz RR, Behrens TK, Dziewaltowski DA. A group-randomized controlled trial for health promotion in Girl Scouts: healthier troops in a SNAP (Scouting Nutrition & Activity Program). *BMC Public Health* 2010;10:81.
74. Rush E, Reed P, McLennan S, et al. A school-based obesity control programme: Project Energize. Two-year outcomes. *Br J Nutr* 2012;107:581-7.
75. Salcedo Aguilar F, Martínez-Vizcaíno V, Sánchez López M, et al. Impact of an after-school physical activity program on obesity in children. *J Pediatr* 2010;157:36-42.e3.
76. Shamah Levy T, Morales Ruán C, Amaya Castellanos C, et al. Effectiveness of a diet and physical activity promotion strategy on the prevention of obesity in Mexican school children. *BMC Public Health* 2012;12:152.
77. Sichieri R, Paula TA, de Souza RA, et al. School randomised trial on prevention of excessive weight gain by discouraging students from drinking sodas. *Public Health Nutr* 2009;12:197-202.
78. Siegrist M, Lammel C, Haller B, et al. Effects of a physical education program on physical activity, fitness, and health in children: the JuvenTUM project. *Scand J Med Sci Sports* 2013;23:323-30.
79. Simon C, Schweitzer B, Oujaa M, et al. Successful overweight prevention in adolescents by increasing physical activity: a 4-year randomized controlled intervention [published erratum in *Int J Obes (Lond)* 2008;32:1606]. *Int J Obes (Lond)* 2008;32:1489-98.
80. Singh AS, Chin APM, Brug J, et al. Dutch obesity intervention in teenagers: effectiveness of a school-based program on body composition and behavior. *Arch Pediatr Adolesc Med* 2009;163:309-17.
81. Singhal N, Misra A, Shah P, et al. Effects of controlled school-based multi-component model of nutrition and lifestyle interventions on behavior modification, anthropometry and metabolic risk profile of urban Asian Indian adolescents in North India. *Eur J Clin Nutr* 2010;64:364-73.
82. Story M, Sherwood NE, Himes JH, et al. An after-school obesity prevention program for African-American girls: the Minnesota GEMS pilot study. *Ethn Dis* 2003;13(Suppl 1):S54-64.
83. Story M, Hannan PJ, Fulkerson JA, et al. Bright Start: description and main outcomes from a group-randomized obesity prevention trial in American Indian children. *Obesity (Silver Spring)* 2012;20:2241-9.
84. Telford RD, Cunningham RB, Fitzgerald R, et al. Physical education, obesity, and academic achievement: a 2-year longitudinal investigation of Australian elementary school children. *Am J Public Health* 2012;102:368-74.
85. Thivel D, Isacco L, Lazaar N, et al. Effect of a 6-month school-based physical activity program on body composition and physical fitness in lean and obese schoolchildren. *Eur J Pediatr* 2011;170:1435-43.
86. Velez A, Golem DL, Arent SM. The impact of a 12-week resistance training program on strength, body composition, and self-concept of Hispanic adolescents. *J Strength Cond Res* 2010;24:1065-73.

87. Webber LS, Catellier DJ, Lytle LA, et al. Promoting physical activity in middle school girls: Trial of Activity for Adolescent Girls. *Am J Prev Med* 2008;34:173-84.
88. Weeks BK, Beck BR. Twice-weekly, in-school jumping improves lean mass, particularly in adolescent boys. *Pediatr Obes* 2012;7:196-204.
89. Wen LM, Baur LA, Simpson JM, et al. Effectiveness of home based early intervention on children's BMI at age 2: randomised controlled trial. *BMJ* 2012;344:e3732.
90. Williamson DA, Champagne CM, Harsha DW, et al. Effect of an environmental school-based obesity prevention program on changes in body fat and body weight: a randomized trial. *Obesity (Silver Spring)* 2012;20:1653-61.
91. Yin Z, Moore JB, Johnson MH, et al. The impact of a 3-year after-school obesity prevention program in elementary school children. *Child Obes* 2012;8:60-70.
